# Supplementary material
Source: publisher site journal article supplement (https://www.dovepress.com/article/278709)

| **Supplementary materials**  **Table S1**. Results of multivariate Cox proportional hazard analysis of mortality at different time interval from hospital admission for patients undergoing to different breathing support modalities. | | | | |
| --- | --- | --- | --- | --- |
|  | **Breathing support** | **60-days mortality** HR (95% CI); *p*-value | **10-days mortality** HR (95% CI); *p*-value | **11- to 60-days mortality** HR (95% CI); *p*-value |
| Model #0 | Oxygen* | 1.000 | 1.000 | 1.000 |
|  | NIV-only | 0.839 (0.424-1.663); 0.616 | 1.017 (0.489-2.115); 0.963 | 0.350 (0.047-2.583); 0.303 |
|  | IMV-after-NIV | 1.307 (0.635-2.690); 0.468 | 0.220 (0.031-1.583); 0.133 | 4.408 (1.906-10.197); 0.001 |
|  | IMV-only | 1.538 (0.892-2.652); 0.122 | 0.547 (0.200-1.500); 0.241 | 4.418 (2.173-8.984); <0.001 |
|  |  |  |  |  |
| Model #1 | Oxygen* | 1.000 | 1.000 | 1.000 |
|  | NIV-only | 1.890 (0.925-3.859); 0.081 | 2.345 (1.084-5.072); 0.030 | 0.707 (0.093-5.392); 0.738 |
|  | IMV-after-NIV | 2.847 (1.326-6.111); 0.007 | 0.530 (0.072-3.919); 0.534 | 7.626 (3.059-19.012); <0.001 |
|  | IMV-only | 3.074 (1.708-5.532); <0.001 | 1.181 (0.415-3.361); 0.755 | 7.312 (3.337-16.021); <0.001 |
|  |  |  |  |  |
| Model #3 | Oxygen* | 1.000 | 1.000 | 1.000 |
|  | NIV-only | 1.793 (0.878-3.660); 0.109 | 2.202 (1.019-4.759); 0.045 | 0.691 (0.090-5.271); 0.721 |
|  | IMV-after-NIV | 2.689 (1.250-5.785); 0.011 | 0.499 (0.067-3.692); 0.496 | 7.376 (2.938-18.515); <0.001 |
|  | IMV-only | 3.037 (1.687-5.468); <0.001 | 1.172 (0.412-3.339); 0.766 | 7.224 (3.295-15.838); <0.001 |
|  |  |  |  |  |
| Model #3 | Oxygen* | 1.000 | 1.000 | 1.000 |
|  | NIV-only | 1.910 (0.926-3.944); 0.080 | 2.650 (1.216-5.772); 0.014 | 0.533 (0.069-4.120); 0.546 |
|  | IMV-after-NIV | 2.869 (1.319-6.239); 0.008 | 0.629 (0.084-4.686); 0.651 | 6.012 (2.344-15.414); <0.001 |
|  | IMV-only | 3.071 (1.706-5.529); <0.001 | 1.182 (0.416-3.357); 0.754 | 6.623 (3.008-14.583); <0.001 |
|  |  |  |  |  |
| Model #4 | Oxygen* | 1.000 | 1.000 | 1.000 |
|  | NIV-only | 1.936 (0.937-4.001); 0.074 | 2.663 (1.222-5.803); 0.014 | 0.539 (0.069-4.180); 0.554 |
|  | IMV-after-NIV | 3.075 (1.405-6.730); 0.005 | 0.655 (0.087-4.933); 0.682 | 6.542 (2.549-16.792); <0.001 |
|  | IMV-only | 3.160 (1.753-5.695); <0.001 | 1.199 (0.421-3.412); 0.734 | 6.888 (3.121-15.203); <0.001 |
|  |  |  |  |  |
| Model #5 | Oxygen* | 1.000 | 1.000 | 1.000 |
|  | NIV-only | 1.778 (0.794-3.980); 0.162 | 3.361 (1.406-8.033); 0.006 | 0.320 (0.038-2.666); 0.292 |
|  | IMV-after-NIV | 2.776 (1.144-6.734); 0.024 | 0.897 (0.111-7.277); 0.919 | 3.689 (1.223-11.133); 0.021 |
|  | IMV-only | 2.966 (1.557-5.652); 0.001 | 1.433 (0.484-4.245); 0.516 | 4.744 (1.918-11.734); 0.001 |
| HR: hazard ratio. CI: confidence interval. Model #0: unadjusted; Model #1: adjusted by age; Model #2: adjusted by age and sex; Model #3: adjusted by age, sex, and administration of steroids; Model #4: adjusted by age, sex, and administration of steroids, and canakinumab; Model #5: adjusted by age, sex, and administration of steroids, canakinumab, and tocilizumab. *: reference | | | | |

**eFigure 1**. Crude (**a**) and adjusted (**b**) Kaplan-Meier curves for the risk of 30-day mortality in patients belonging to the study groups according to provided respiratory support.


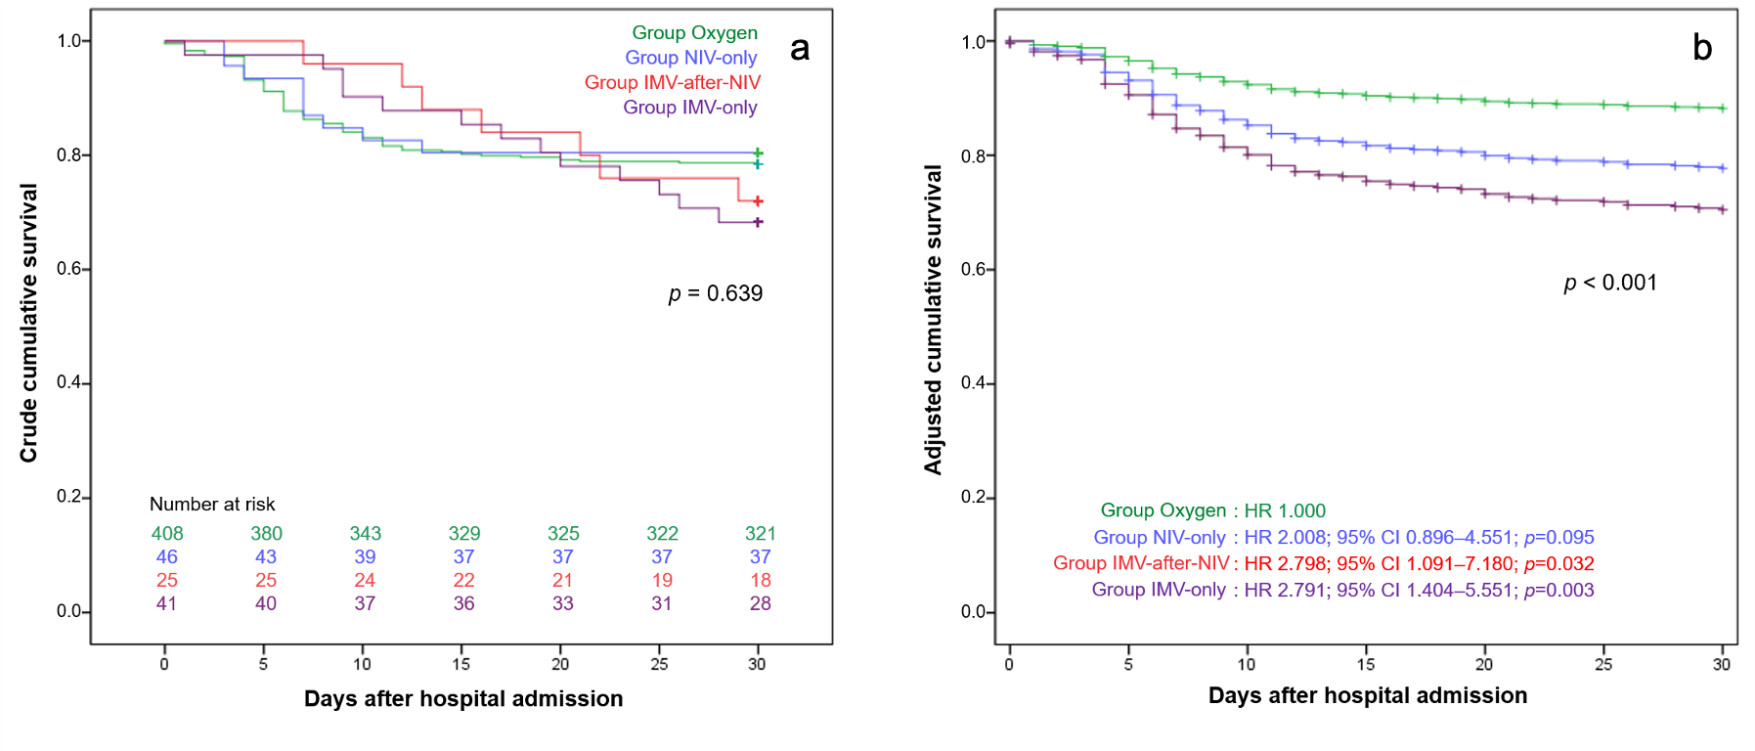


**eFigure 2**. Adjusted hazard ratios for 10-day (**a**) and 11 to 60-day (**b**) mortality in patients belonging to the study groups according to provided respiratory support.


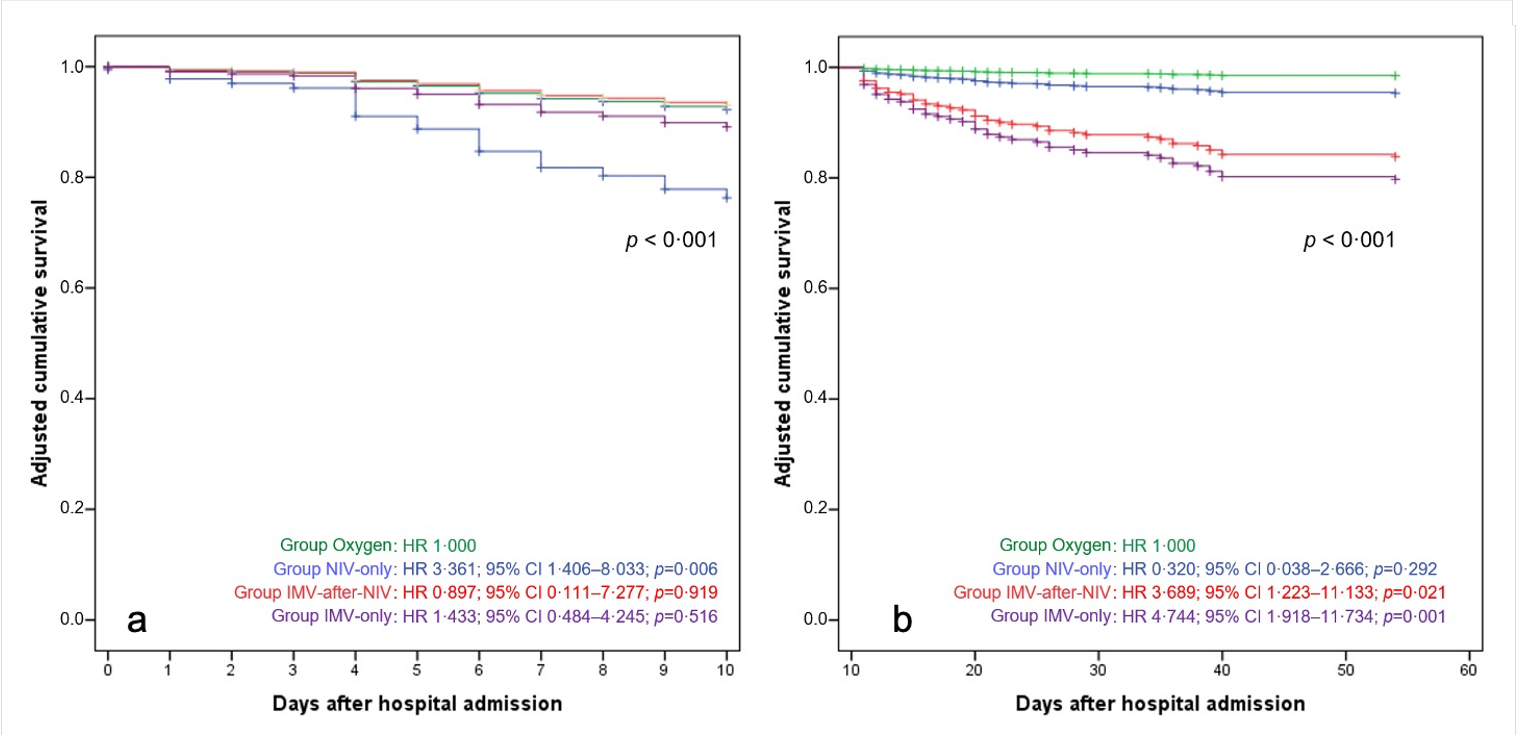

Supplement: Supplementary file 1 [file get_supplementary_file.php]
