# Supplementary material
Source: publisher site journal article supplement (https://www.dovepress.com/article/278709)

**Supplementary materials****Table S1.** Results of multivariate Cox proportional hazard analysis of mortality at different time interval from hospital admission for patients undergoing to different breathing support modalities.

|          | <b>Breathing support</b> | <b>60-days mortality</b><br>HR (95% CI); <i>p</i> -value | <b>10-days mortality</b><br>HR (95% CI); <i>p</i> -value | <b>11- to 60-days mortality</b><br>HR (95% CI); <i>p</i> -value |
|----------|--------------------------|----------------------------------------------------------|----------------------------------------------------------|-----------------------------------------------------------------|
| Model #0 | Oxygen*                  | 1.000                                                    | 1.000                                                    | 1.000                                                           |
|          | NIV-only                 | 0.839 (0.424-1.663); 0.616                               | 1.017 (0.489-2.115); 0.963                               | 0.350 (0.047-2.583); 0.303                                      |
|          | IMV-after-NIV            | 1.307 (0.635-2.690); 0.468                               | 0.220 (0.031-1.583); 0.133                               | 4.408 (1.906-10.197); 0.001                                     |
|          | IMV-only                 | 1.538 (0.892-2.652); 0.122                               | 0.547 (0.200-1.500); 0.241                               | 4.418 (2.173-8.984); <0.001                                     |
| Model #1 | Oxygen*                  | 1.000                                                    | 1.000                                                    | 1.000                                                           |
|          | NIV-only                 | 1.890 (0.925-3.859); 0.081                               | 2.345 (1.084-5.072); 0.030                               | 0.707 (0.093-5.392); 0.738                                      |
|          | IMV-after-NIV            | 2.847 (1.326-6.111); 0.007                               | 0.530 (0.072-3.919); 0.534                               | 7.626 (3.059-19.012); <0.001                                    |
|          | IMV-only                 | 3.074 (1.708-5.532); <0.001                              | 1.181 (0.415-3.361); 0.755                               | 7.312 (3.337-16.021); <0.001                                    |
| Model #3 | Oxygen*                  | 1.000                                                    | 1.000                                                    | 1.000                                                           |
|          | NIV-only                 | 1.793 (0.878-3.660); 0.109                               | 2.202 (1.019-4.759); 0.045                               | 0.691 (0.090-5.271); 0.721                                      |
|          | IMV-after-NIV            | 2.689 (1.250-5.785); 0.011                               | 0.499 (0.067-3.692); 0.496                               | 7.376 (2.938-18.515); <0.001                                    |
|          | IMV-only                 | 3.037 (1.687-5.468); <0.001                              | 1.172 (0.412-3.339); 0.766                               | 7.224 (3.295-15.838); <0.001                                    |
| Model #3 | Oxygen*                  | 1.000                                                    | 1.000                                                    | 1.000                                                           |
|          | NIV-only                 | 1.910 (0.926-3.944); 0.080                               | 2.650 (1.216-5.772); 0.014                               | 0.533 (0.069-4.120); 0.546                                      |
|          | IMV-after-NIV            | 2.869 (1.319-6.239); 0.008                               | 0.629 (0.084-4.686); 0.651                               | 6.012 (2.344-15.414); <0.001                                    |
|          | IMV-only                 | 3.071 (1.706-5.529); <0.001                              | 1.182 (0.416-3.357); 0.754                               | 6.623 (3.008-14.583); <0.001                                    |
| Model #4 | Oxygen*                  | 1.000                                                    | 1.000                                                    | 1.000                                                           |
|          | NIV-only                 | 1.936 (0.937-4.001); 0.074                               | 2.663 (1.222-5.803); 0.014                               | 0.539 (0.069-4.180); 0.554                                      |
|          | IMV-after-NIV            | 3.075 (1.405-6.730); 0.005                               | 0.655 (0.087-4.933); 0.682                               | 6.542 (2.549-16.792); <0.001                                    |
|          | IMV-only                 | 3.160 (1.753-5.695); <0.001                              | 1.199 (0.421-3.412); 0.734                               | 6.888 (3.121-15.203); <0.001                                    |
| Model #5 | Oxygen*                  | 1.000                                                    | 1.000                                                    | 1.000                                                           |
|          | NIV-only                 | 1.778 (0.794-3.980); 0.162                               | 3.361 (1.406-8.033); 0.006                               | 0.320 (0.038-2.666); 0.292                                      |
|          | IMV-after-NIV            | 2.776 (1.144-6.734); 0.024                               | 0.897 (0.111-7.277); 0.919                               | 3.689 (1.223-11.133); 0.021                                     |
|          | IMV-only                 | 2.966 (1.557-5.652); 0.001                               | 1.433 (0.484-4.245); 0.516                               | 4.744 (1.918-11.734); 0.001                                     |

HR: hazard ratio. CI: confidence interval. Model #0: unadjusted; Model #1: adjusted by age; Model #2: adjusted by age and sex; Model #3: adjusted by age, sex, and administration of steroids; Model #4: adjusted by age, sex, and administration of steroids, and canakinumab; Model #5: adjusted by age, sex, and administration of steroids, canakinumab, and tocilizumab. \*: reference

**eFigure 1.** Crude (a) and adjusted (b) Kaplan-Meier curves for the risk of 30-day mortality in patients belonging to the study groups according to provided respiratory support.

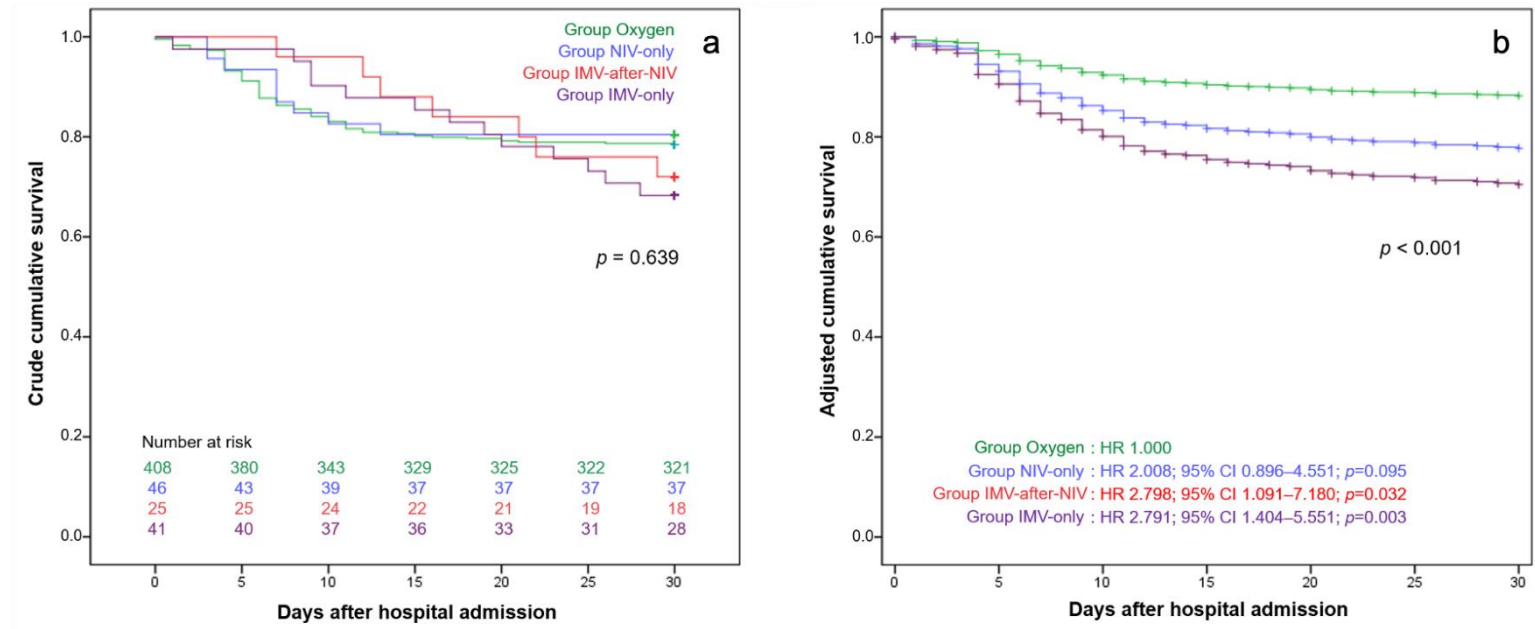

**eFigure 2.** Adjusted hazard ratios for 10-day (a) and 11 to 60-day (b) mortality in patients belonging to the study groups according to provided respiratory support.

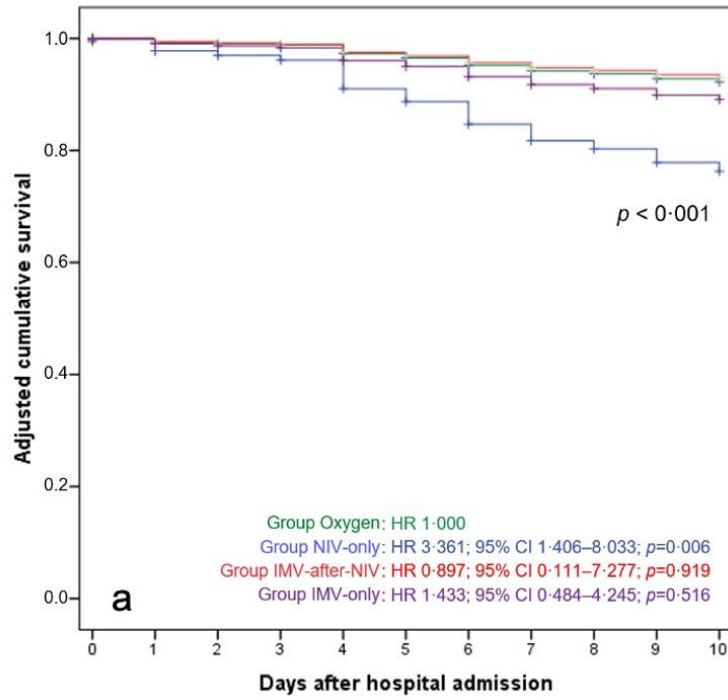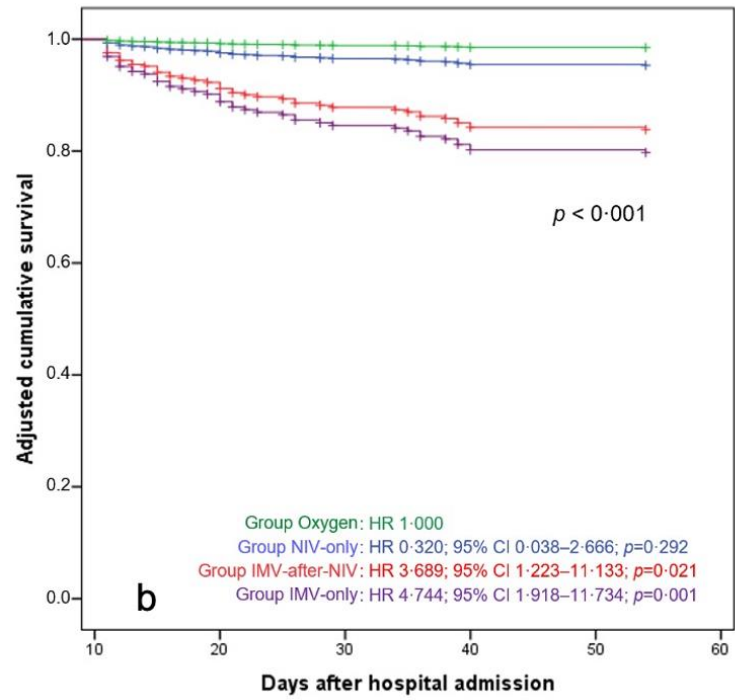

Supplement: Supplementary file 2 [file get_supplementary_file.php]
